# Supplementary material for: Microstructure-related performances of poly(vinyl alcohol)-silica hybrid membranes: a molecular dynamics simulation study
Source: Royal Society of Chemistry journal article supplement (doi:10.1039/c2jm30653k), 2012-01-01
Supplement: c2jm30653k.pdf [file c2jm30653k.pdf]

*Supplementary Information:*

**Microstructure-related performances of poly(vinyl alcohol)-silica hybrid membranes: A molecular dynamics simulation study**

*Qiu Gen Zhang\**, *Qing Lin Liu\**, *Shu Ping Huang*, *Wen Wei Hu* and *Ai Mei Zhu*

Department of Chemical & Biochemical Engineering, College of Chemistry & Chemical Engineering, Xiamen University, Xiamen 361005, China

E-mail: [qgzhang@xmu.edu.cn](mailto:qgzhang@xmu.edu.cn) (Q.G. Zhang), [qlliu@xmu.edu.cn](mailto:qlliu@xmu.edu.cn) (Q.L. Liu)

**Table of figures**

Fig. S1 Flow chart for studying PVA membrane by MD simulations.

Fig. S2 Flow chart for studying PVA-silica hybrid membranes by MD simulations.

Fig.S3 Solubility parameters of the PVA-silica hybrid membranes.

Fig.S4 Effect of APTS content on density of the hybrid membranes.

Fig.S5 Chemical structure of self-condensation of APTS in the hybrid membrane with 2 mol% APTS.

Fig.S6 Effect of APTS content on the simulated X-ray scattering spectra of the hybrid membranes.

Fig.S7 Effect of APTS content on the interchain ( $g(r)$ ) of backbone carbon atoms from PVA chains in the hybrid membranes.

**Part. A Flow charts for studying PVA membrane and its hybrid membranes by MD simulations**

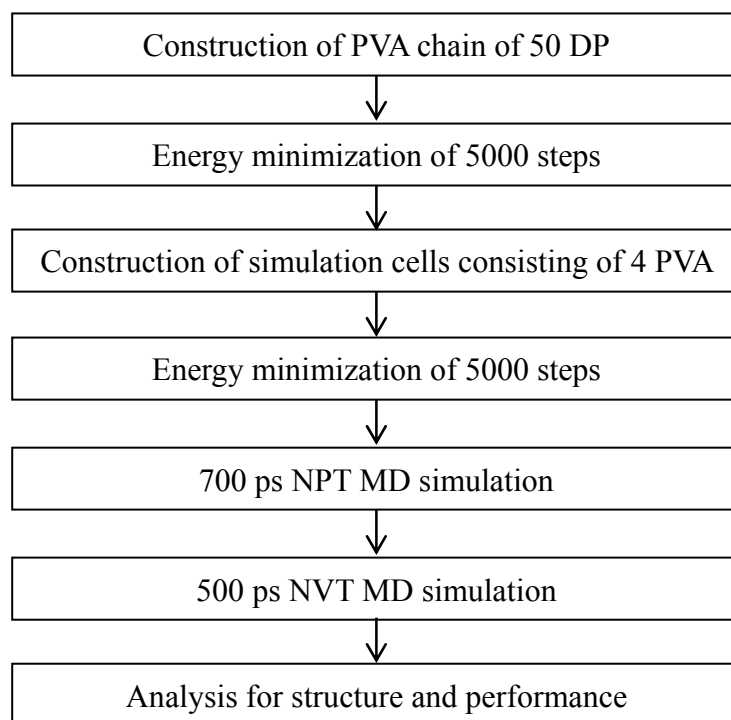

**Fig. S1** Flow chart for studying PVA membrane by MD simulations.

Supplementary Materials (ESI) for *Journal of Materials Chemistry*  
This journal is © The Royal Society of Chemistry 2012

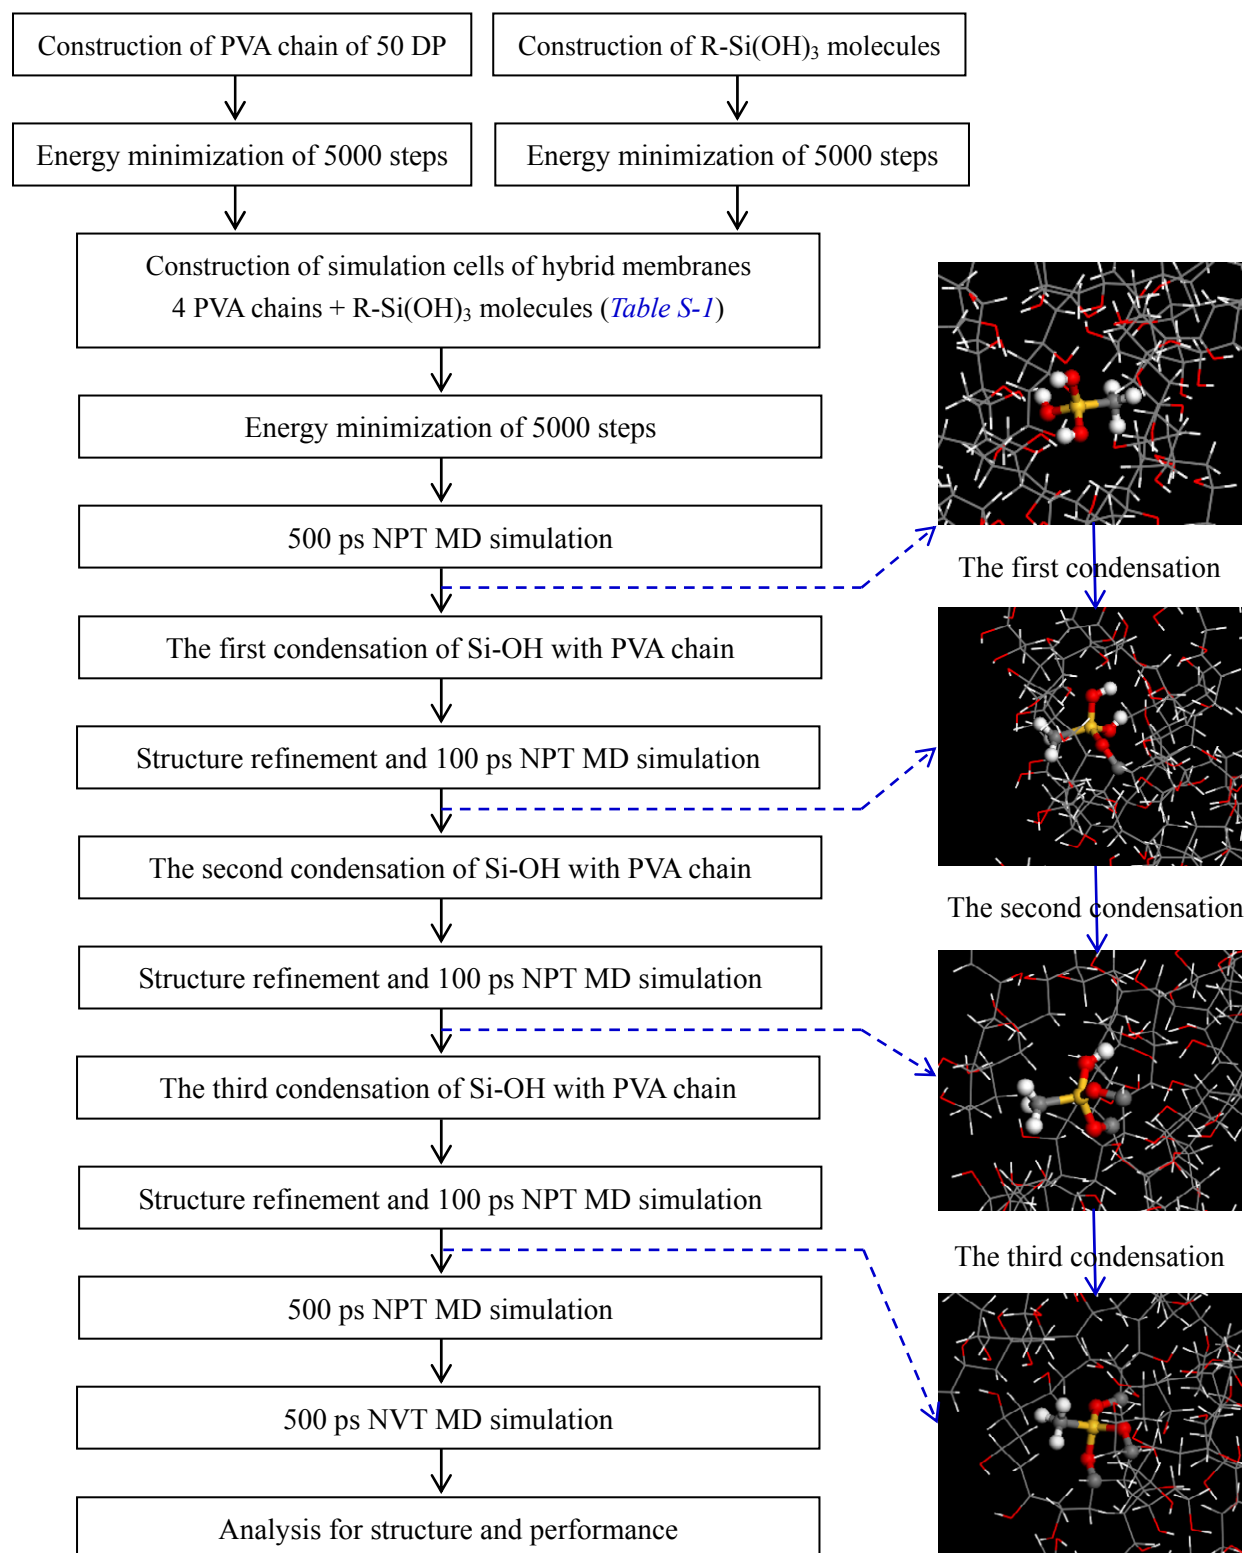

**Fig. S2** Flow chart for studying PVA-silica hybrid membrane by MD simulations.

**Part. B Solubility parameters of the PVA-silica hybrid membranes**

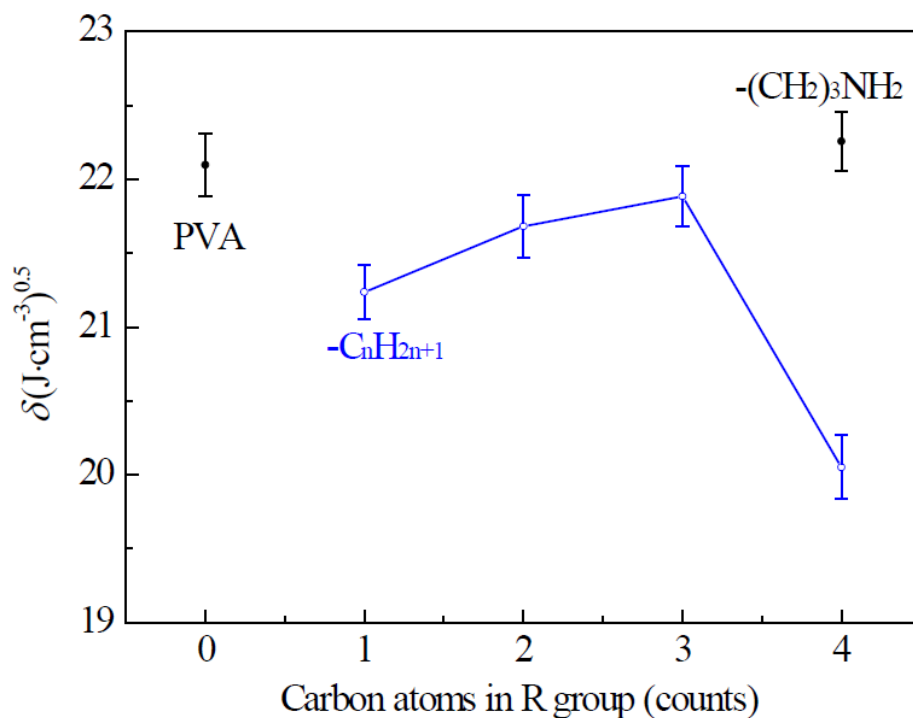

**Fig.S3** Solubility parameters of the PVA-silica hybrid membranes.

**Part. C Effect of APTS content on properties of the PVA/APTS hybrid membranes**

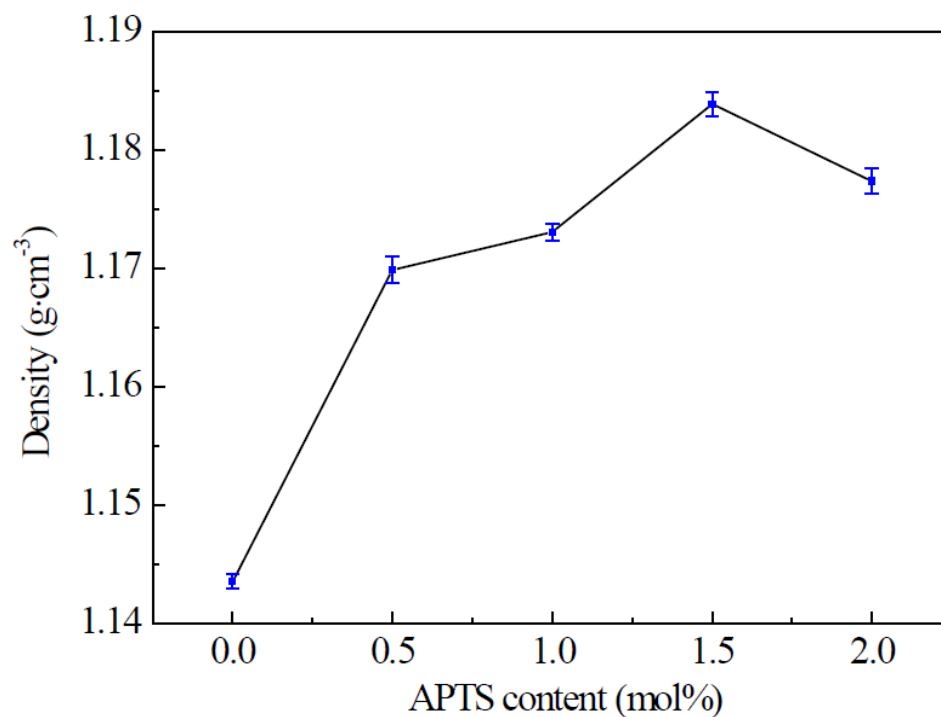

**Fig.S4** Effect of APTS content on density of the hybrid membranes.

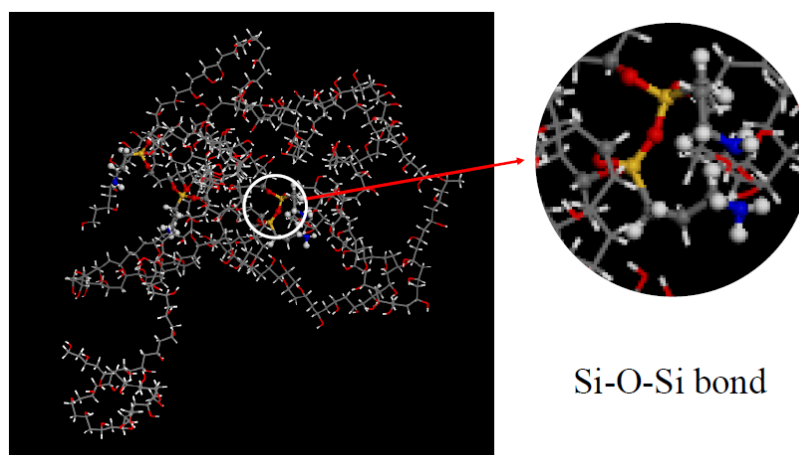

**Fig.S5** Chemical structure of self-condensation of APTS in the hybrid membrane with 2 mol% APTS.

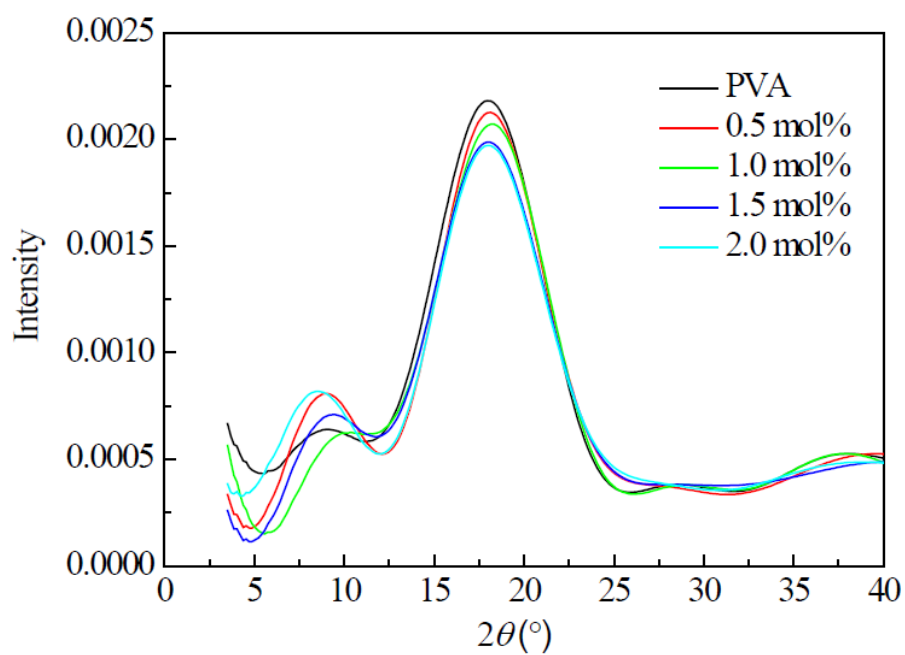

**Fig.S6** Effect of APTS content on the simulated X-ray scattering spectra of the hybrid membranes.

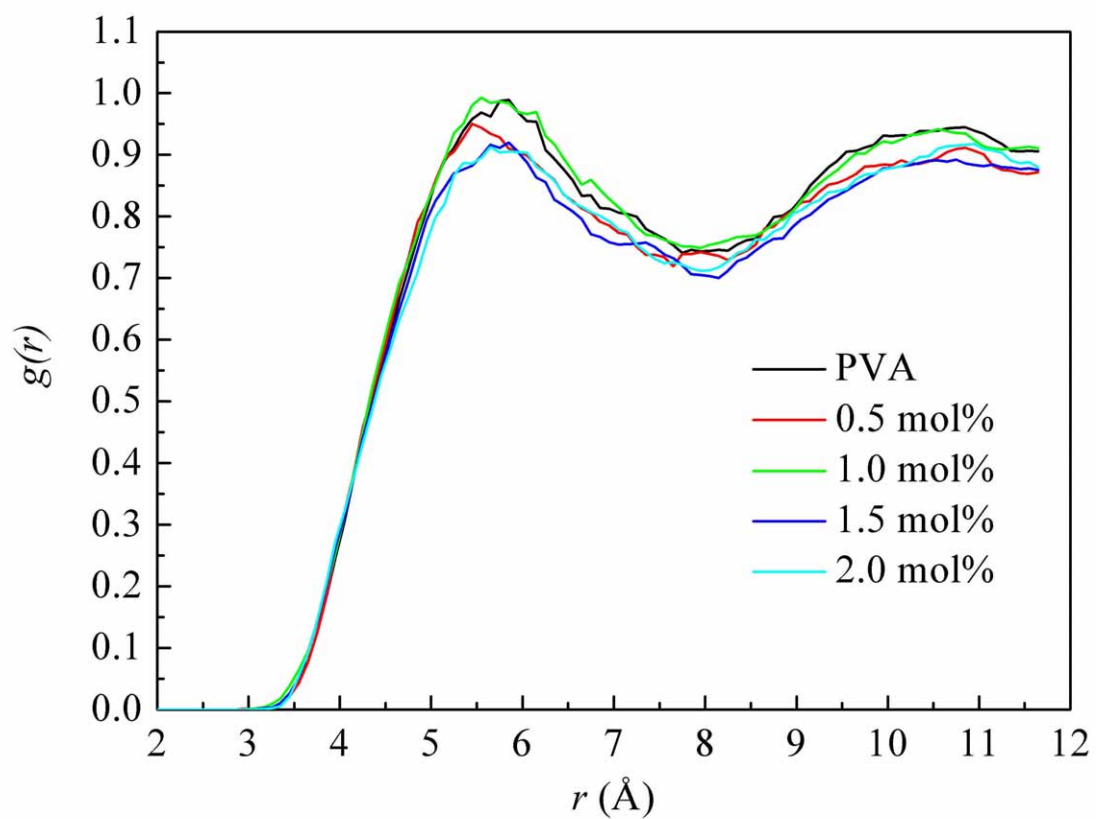

**Fig. S7** Effect of APTS content on the interchain ( $g(r)$ ) of backbone carbon atoms from PVA chains in the hybrid membranes.
